1 **Interleukin-10 suppression enhances T-cell antitumor immunity**  
2 **and responses to checkpoint blockade in chronic lymphocytic**  
3 **leukemia**

4 J.R. Rivas<sup>1,2</sup>, S.S. Alhakeem<sup>1,2</sup>, Y. Liu<sup>3,4</sup>, J.M. Eckenrode<sup>3</sup>, F. Marti<sup>5</sup>, J.P. Collard<sup>1,2</sup>, Y.  
5 Zhang<sup>3,4</sup>, K.A. Shaaban<sup>3,4</sup>, N. Muthusamy<sup>6</sup>, G.C. Hildebrandt<sup>1,2,7</sup>, R.A. Fleischman<sup>2,7</sup>, L.  
6 Chen<sup>2,8</sup>, J.S. Thorson<sup>2,3,4</sup>, M. Leggas<sup>2,3,4</sup>, S. Bondada<sup>1,2,#</sup>

7 *<sup>1</sup>Dept. of Microbiology, Immunology and Molecular Genetics, University of Kentucky,*  
8 *Lexington, KY 40536*

9 *<sup>2</sup>Markey Cancer Center, University of Kentucky, Lexington, KY 40536*

10 *<sup>3</sup>Dept. of Pharmaceutical Sciences, University of Kentucky, Lexington, KY 40536*

11 *<sup>4</sup>Center for Pharmaceutical Research and Innovation, University of Kentucky, Lexington,*  
12 *KY 40536*

13 *<sup>5</sup>Dept. of Surgery, University of Kentucky, Lexington, KY 40536*

14 *<sup>6</sup>Dept. of Internal Medicine and Comprehensive Cancer Center, Ohio State University,*  
15 *Columbus, OH 43210*

16 *<sup>7</sup>Division of Hematology and Blood and Marrow Transplant, University of Kentucky,*  
17 *Lexington, KY 40536*

18 *<sup>8</sup>Dept. of Biostatistics, University of Kentucky, Lexington, KY 40536*

19 **Running title:** Suppressing interleukin-10 improves immune checkpoint blockade

20 **#Correspondence:** Subbarao Bondada, University of Kentucky, 800 Rose St., 212

21 Combs Research Building, Lexington, KY 40536; e-mail: [bondada@email.uky.edu](mailto:bondada@email.uky.edu)

22 Phone number: 859-323-4705; Fax number: 859-257-9608

23 **Manuscript word count:** 3999      **Abstract word count:** 200

24 **Number of Figures:** 8      **Number of references:** 59

25 **Keywords:** CLL, immune checkpoint blockade, IL-10, antitumor immunity

1 **Abstract:**

2 T-cell dysfunction is a hallmark of B-cell Chronic Lymphocytic Leukemia (CLL).  
3 CLL cells downregulate T-cell responses by expressing regulatory molecules including  
4 programmed death ligand-1 (PD-L1) and Interleukin-10 (IL-10). Immune checkpoint  
5 blockade (ICB) aims to restore T-cell function by preventing the ligation of inhibitory  
6 receptors like PD-1, however most CLL patients do not respond well to this therapy. Thus,  
7 we investigated whether IL-10 suppression could enhance antitumor T-cell activity and  
8 improve responses to ICB. Since CLL IL-10 expression depends on Sp1, we utilized a  
9 novel, better tolerated mithramycin analogue, MTM<sub>ox</sub>32E, to suppress CLL IL-10. We  
10 found MTM<sub>ox</sub>32E inhibited mouse and human CLL IL-10 production and maintained T-cell  
11 effector function. In the E $\mu$ -Tcl1 mouse model, treatment reduced plasma IL-10 and CLL  
12 burden while it increased CD8<sup>+</sup> T-cell proliferation, effector and memory cell prevalence,  
13 and interferon- $\gamma$  production. When combined with ICB, suppression of IL-10 improved  
14 responses to anti-PD-L1 as shown by a 4.5-fold decrease in CLL cell burden compared  
15 with anti-PD-L1 alone. Combination therapy also produced more interferon- $\gamma$ <sup>+</sup>, cytotoxic  
16 effector KLRG1<sup>+</sup>, and memory CD8<sup>+</sup> T-cells, with fewer exhausted T-cells than ICB alone.  
17 Since current therapies for CLL do not target IL-10, this provides a novel strategy to  
18 increase the efficacy of T-cell-based immunotherapies.

19

1 **Introduction:**

2 B-cell Chronic Lymphocytic Leukemia (CLL) is a malignancy of CD5<sup>+</sup>CD19<sup>+</sup> B-  
3 lymphocytes accompanied by severe immune dysfunction. In CLL, T-cells are an  
4 essential component of the microenvironment that play a controversial role in disease  
5 progression. Patient T-cells exhibit numerous functional defects that impede immunity  
6 but retain expression of molecules that aid CLL growth. CLL cells downregulate  
7 antitumor T-cell responses by expressing regulatory molecules including checkpoint  
8 ligands and anti-inflammatory cytokines like interleukin-10 (IL-10)(1-5). As a result, CLL  
9 patient T-cells show decreased proliferation after stimulation, increased inhibitory  
10 receptor expression, and cytoskeletal defects that impair immune synapse formation(1,  
11 6, 7). These functional defects result in skewed T-cell subset distributions, altered T-cell  
12 metabolism, and increased pseudo-exhausted T-cells that contribute to immune  
13 dysfunction in CLL(1, 8). Immune suppression becomes a major complication for CLL  
14 patients, as the leading causes of morbidity and mortality are infections and secondary  
15 cancers(9). Since CLL is rarely curable, there is a need for new approaches to restore  
16 immunity.

17 Unfortunately, treatments aiming to reestablish T-cell functionality have  
18 experienced limited success in CLL patients(10). After repeated antigen stimulation, T-  
19 cells begin to express checkpoint ligand receptors such as programmed death-1 (PD-1)  
20 that decrease T-cell receptor sensitivity. Ligation of these receptors decrease CD8<sup>+</sup> T-  
21 cell antitumor immunity and result in T-cell exhaustion(1). Antibody-based immune  
22 checkpoint blockade (ICB) can upregulate T-cell activity by preventing the interaction  
23 between these inhibitory receptors and their ligands. Pembrolizumab (anti-PD-1) ICB  
24 was tested in high risk CLL patients, but only those with Richter's transformation  
25 responded(10). This suggests that additional mechanisms downregulate T-cell antitumor  
26 immunity. Even adoptively transferred anti-CD20 chimeric antigen receptor (CAR) T-

1 cells upregulate apoptosis and exhaustion genes in most CLL patients, resulting in a  
2 surprisingly low frequency of responders(11). Hence several studies are exploring  
3 combination therapies to improve responses to T-cell immunotherapy in CLL(12-14).

4 Since IL-10 is a well-known anti-inflammatory cytokine, we reasoned that CLL-  
5 derived IL-10 also suppresses host antitumor T-cell responses(3, 4). Members of the IL-  
6 10 cytokine family control immune responses in cancer, autoimmune conditions, and  
7 inflammatory diseases. Elevated IL-10 levels are correlated with more aggressive  
8 disease in CLL and a variety of other cancers(15, 16). On average, plasma IL-10 levels  
9 are higher in CLL patients than healthy donors, and those with increased IL-10 have a  
10 worse 3-year survival rate(15). Reduced DNA methylation at the IL-10 locus or  
11 polymorphisms that increase IL-10 production are also correlated with decreased  
12 survival in CLL(17, 18). Despite the importance of IL-10 in the microenvironment and  
13 improved antitumor responses with IL-10 blockade(19-21), blocking IL-10 is not yet  
14 approved for cancer therapy(22, 23). In our previous study, we found IL-10R<sup>-/-</sup> CD8<sup>+</sup> T-  
15 cells were more effective at controlling CLL growth in the E $\mu$ -TCL1 mouse model(4). E $\mu$ -  
16 TCL1 mice express the oncogene T-cell leukemia 1 (TCL1) under the  $\mu$ -enhancer and  
17 the VH promoter which leads to development of an aggressive CLL-like disease in 9 to  
18 11 months(24). Like their human counterparts, these murine CLL cells secrete IL-10 in a  
19 BCR dependent manner, which can be inhibited by small molecules that interact with  
20 kinases and transcription factors downstream of the BCR(3-5).

21 Here we hypothesized inhibiting IL-10 would restore host antitumor responses  
22 and improve the efficacy of T-cell-based immunotherapy. We suppressed CLL-derived  
23 IL-10 by inhibiting Sp1, a transcription factor required for CLL IL-10 production(4), with a  
24 novel analog of mithramycin (MTM<sub>ox</sub>32E) and compared this to an anti-IL-10 blocking  
25 antibody. MTM<sub>ox</sub>32E exhibits reduced toxicity and increased potency in other cancer  
26 models (Liu and Eckenrode et al, manuscript in preparation)(25). When combined with



- 1 anti-PD-L1, we show suppressing IL-10 in this manner reduces tumor burden and
- 2 enhances T-cell functionality in mice over ICB alone. Thus, suppressing IL-10 could
- 3 potentially be used to improve antitumor T-cell function in human CLL and other cancers
- 4 with T-cell dysfunctionality.

1 **Methods:**

2 **Human CLL samples**

3 Patient blood was obtained with informed consent in accordance with the  
4 regulations of the Institutional Review Board of the University of Kentucky Research  
5 Foundation. Diagnosis of CLL was assigned by board-certified hematologists  
6 (Supplementary Table 1). Peripheral blood mononuclear cells (PBMCs) were isolated by  
7 Ficoll-Paque density centrifugation, then CD45<sup>+</sup>CD5<sup>+</sup>CD19<sup>+</sup> CLL cells and their  
8 expression of CD38, Zap70 and CD49d were evaluated by flow cytometry (antibodies in  
9 Supplementary Table 2) on an LSR II flow cytometer (BD Biosciences, Franklin Lakes,  
10 NJ). Mutational status of the expressed BCR was determined by PCR amplification from  
11 PBMC RNA and sequencing, as previously described(4).

12

13 **Mice**

14 E $\mu$ -TCL1 (C57BL/6J background), NOD.SCID IL-2R $\gamma^{-/-}$  (NSG), and C57BL/6J  
15 mice were bred in house. Experimental groups were randomized by including both  
16 genders and mice were aged 8-12 weeks. Animals were treated according to the ethical  
17 standards of the University of Kentucky Institutional Animal Care and Use Committee  
18 (IACUC). Three to four million CD19<sup>+</sup> bead purified E $\mu$ -TCL1 cells were adoptively  
19 transferred into NSG mice with or without primed CD8<sup>+</sup> T-cells at a ratio of 32:1 (CLL:T).  
20 CD19 sorts were performed with MojoSort Mouse Pan B Isolation Kit II (BioLegend, San  
21 Diego, CA) and CD8 sorts with Miltenyi's magnetic-activated cell sorting (MACS) CD8 $\alpha$ +  
22 T-cell Isolation Kit (Miltenyi Biotec, Bergisch Gladbach, Germany) according to the  
23 manufacturers' protocols. To prime CD8<sup>+</sup> T-cells, ten million Ficoll-Paque purified E $\mu$ -  
24 TCL1 splenocytes (>90% CD5<sup>+</sup>CD19<sup>+</sup>) were adoptively transferred into C57BL/6J mice  
25 and ten days later T-cells were sorted from the spleen. Disease burden was monitored  
26 by sub-mental or sub-mandibular bleeding to determine CD45<sup>+</sup>CD5<sup>+</sup>CD19<sup>+</sup> frequency on

1 an LSR II flow cytometer (BD Biosciences) and CD45<sup>+</sup> cell count on a MACSQuant VYB  
2 Flow Cytometer (Miltenyi Biotec). Mice were treated with 12mg/kg MTM<sub>ox32E</sub> or vehicle  
3 (5% Kolliphor EL, 1% DMSO) by intravenous tail vein injection, 150µg/mouse anti-IL-10  
4 (clone JES5-2A5, BioXCell, West Lebanon, NH), or 10mg/kg anti-PD-L1 or isotype  
5 control by intraperitoneal injection (clone B7-H1, BioXCell). Investigators were not  
6 blinded to treatment groups. When CD5<sup>+</sup>CD19<sup>+</sup> cells comprised more than 70% of the  
7 peripheral blood, mice were euthanized along with controls. For *in vivo* proliferation, 1mg  
8 of BrdU in 100µL PBS was injected intraperitoneally three hours before euthanasia.

9

## 10 **Cell culture**

11 Eµ-TCL1 splenocytes, human CLL PBMCs (hCLL), and sorted T-cell subsets  
12 were cultured at 1x10<sup>6</sup>/mL in complete RPMI 1640 (cRPMI) media for 24 hours in 96 well  
13 plates. Concentrations of inhibitors and stimulants used are listed in the figure legends.  
14 CD8<sup>+</sup> T-cells were sorted from C57BL/6J spleens as above, and CD4<sup>+</sup> T-cells were  
15 sorted with Miltenyi's MACS CD4<sup>+</sup> T-cell Isolation Kit (Miltenyi Biotec) according to the  
16 manufacturer's protocol. Anti-human or mouse IgM (Jackson ImmunoResearch, West  
17 Grove, PA), CpG (Integrated DNA Technologies, Coralville, IA), anti-mouse CD3  
18 (BioLegend), anti-mouse CD28 (BioLegend) and MTM (Enzo Life Sciences,  
19 Farmingdale, NY) are commercially sourced, while MTM<sub>ox32E</sub> was synthesized in house  
20 (Liu and Eckenrode et al, manuscript in preparation). Secreted cytokines were measured  
21 with ELISA MAX Standard Set Mouse or Human kits according to the manufacturer's  
22 protocol (BioLegend). Cellular viability was determined by resazurin fluorescence after  
23 collecting supernatants for cytokine ELISAs. Cells were resuspended in 0.1mM  
24 resazurin (Sigma Aldrich, St. Louis, MO) in cRPMI, incubated four hours at 37°C, and  
25 fluorescence readings (ex:560nm, em:590nm) were recorded with a SpectraMax M5  
26 plate reader (Molecular Devices, Sunnyvale, CA)(26).

1

## 2 **Proliferation assays**

3 CD8<sup>+</sup> cells were primed and sorted as above, then cultured at  $0.75 \times 10^6$ /mL in  
4 cRPMI for three days with soluble 10 $\mu$ g/mL anti-CD3 (BioLegend) and/or FicolI-Paque  
5 purified E $\mu$ -TCL1 splenocytes in flat-bottom 96-well plates. After this, cells were pulsed  
6 with 1 $\mu$ Ci <sup>3</sup>H-thymidine (Perkin Elmer, Waltham, MA) or 10 $\mu$ M BrdU for four hours at  
7 37°C. Counts from <sup>3</sup>H-thymidine incorporation were measured with a TopCount NXT  
8 Microplate Scintillation & Luminescence Counter (Perkin Elmer) and BrdU incorporation  
9 was measured on an LSR II flow cytometer (BD Biosciences).

10

## 11 **Statistics**

12 *A priori* power analysis was performed to determine the number of mice used in each  
13 experiment. GraphPad Prism 8 software was used to perform comparisons after  
14 completion (GraphPad Software, San Diego, CA). Tests used to determine statistical  
15 significance are listed in each figure legend. To determine statistical significance, one-  
16 way ANOVA was used for three or more groups, two-way ANOVA was used for two or  
17 more groups over various time points or concentrations, and two-tailed student's t-test  
18 was used between only two groups. Variance was comparable between groups in the  
19 same test.

20

21 Additional information is in the Supplementary Materials and Methods.

22

1 **Results:**

2 **Blocking CLL-derived IL-10 restores T-cell function**

3 Previously we observed removing IL-10 signaling from CD8<sup>+</sup> T-cells improves  
4 control of CLL growth in the E $\mu$ -TCL1 adoptive transfer model(4). Considering IL-10 is a  
5 potent regulator of T-cell antitumor immunity(23), we hypothesized that CLL-derived IL-  
6 10 inhibits CLL-primed CD8<sup>+</sup> T-cell responses to antigenic stimuli. To test this, we  
7 primed C57BL/6J CD8<sup>+</sup> T-cells with E $\mu$ -TCL1 splenocytes *in vivo* and determined their  
8 ability to respond to re-challenge with CLL *ex vivo*. Stimulation with anti-CD3 alone  
9 caused some T-cell proliferation, which was not changed by anti-IL-10 antibody (Figure  
10 1A). In CLL-T-cell cocultures, IL-10 levels were only moderately increased, and anti-IL-  
11 10 did not change T-cell proliferation (Figures 1A, 1B). In contrast, at higher CD8<sup>+</sup>:CLL  
12 ratios, proliferation increased four-fold when IL-10 was blocked (Figure 1A). This is not  
13 due to activity of anti-IL-10 on CLL cells, as blocking IL-10 does not enhance E $\mu$ -TCL1  
14 proliferation under co-culture conditions(4). Anti-CD3 activated CD8<sup>+</sup> T-cells produced a  
15 small amount of IL-10. IL-10 levels were much higher in CLL-CD8<sup>+</sup> T-cell co-cultures.  
16 (Figure 1B). In CLL-T-cell co-cultures there was very little IFN- $\gamma$  which was substantially  
17 increased by neutralizing IL-10 Figure 1C).

18 In earlier studies we also showed CLL IL-10 production depends on Sp1  
19 activity(4). Sp1 binds GC rich regions of DNA to regulate transcription, which can be  
20 competitively inhibited by MTM or MTM analogues(27). We observed that inhibiting CLL  
21 IL-10 with the MTM analogue MTM<sub>ox</sub>32E acted like the anti-IL-10 antibody in CD8<sup>+</sup>:CLL  
22 co-cultures. CLL cells suppressed proliferation of primed CD8<sup>+</sup> T-cells, which was  
23 rescued by MTM<sub>ox</sub>32E treatment in the 1:1 co-cultures, where high IL-10 levels were  
24 suppressed (Figure 1D). In 1:0.33 co-cultures, IL-10 levels were low with only a small  
25 effect of the drug on T-cell proliferation (Figure 1D-E). Drug treatment did not affect anti-  
26 CD3 driven proliferation of primed CD8<sup>+</sup> T-cells in isolation (Figure 1D). IL-10 levels

1 decreased with MTM<sub>ox</sub>32E treatment (Figure 1E), and IFN- $\gamma$  secretion increased (Figure  
2 1F), like in co-cultures blocked with anti-IL-10. Notably, 1 $\mu$ M MTM<sub>ox</sub>32E treatment did  
3 not alter IFN- $\gamma$  secretion from anti-CD3 stimulated, primed CD8<sup>+</sup> T-cells in the absence  
4 of CLL (Figure 1F).

5

## 6 **Novel MTM analogue suppresses IL-10 and preserves T-cell function**

7 Dose response studies showed that MTM<sub>ox</sub>32E decreased E $\mu$ -TCL1 IL-10  
8 production with an IC50 of 70nM (Figure 2A). In contrast, MTM<sub>ox</sub>32E treatment did not  
9 significantly inhibit cytokine production by isolated CD4<sup>+</sup> or CD8<sup>+</sup> T-cells after 24 hours in  
10 culture (Figure 2A), or CD8<sup>+</sup> T-cell proliferation after 48 hours (Figure 2B) in the same  
11 dose range. MTM<sub>ox</sub>32E also decreased hCLL PBMC IL-10 production in 93% of patients  
12 tested (Figure 2C, Supplementary Table 3) and suppressed IL-10 production by the  
13 human CLL cell line, Mec-1 (Supplementary Figure 1A). Chromatin immunoprecipitation  
14 with Sp1 in Mec-1 cells showed MTM<sub>ox</sub>32E reduced Sp1 promoter occupancy of two GC  
15 rich sites in the IL-10 promoter (Figure 2D) and reduced IL-10 transcription  
16 (Supplementary Figure 1B), consistent with Sp1 displacement. Notably, the mRNA  
17 levels of Sp1 target genes involved in cell cycle and survival were less affected by  
18 MTM<sub>ox</sub>32E than MTM in Mec-1 cells and hCLL PBMCs, leading to less inhibition of  
19 cellular viability (Supplementary Figures 1B-E). MTM<sub>ox</sub>32E only mildly affected the  
20 viability of healthy human PBMCs after five days in culture (Supplementary Figure 1F)  
21 and did not decrease human CD4<sup>+</sup> and CD8<sup>+</sup> T-cell cytokine production in mixed  
22 cultures after 5 days at the dose (100nM) that blocks IL-10 production (Supplementary  
23 Figure 2), though there was some inhibition at higher doses (data not shown). Taken  
24 together, these results indicate MTM<sub>ox</sub>32E reduces CLL-derived IL-10 production while  
25 preserving antitumor T-cell activity.

26

## 1 **Inhibiting CLL-derived IL-10 production enhances T-cell antitumor immunity**

2           Since anti-IL-10 and MTM<sub>ox</sub>32E similarly suppressed CLL IL-10 and enhanced  
3 primed CD8<sup>+</sup> T-cell activity in co-culture, these treatments were tested in our previously  
4 established adoptive transfer model of E $\mu$ -TCL1 in NSG mice(4). Disease burden was  
5 monitored by the appearance of CD5<sup>+</sup>CD19<sup>+</sup> CLL cells in the blood and mice were  
6 euthanized when blood CLL reached 70-80%. Without T-cells, CLL grew to 70-80% of  
7 peripheral blood cells in 15-16 days (Figure 2E-F, Supplementary Figures 3A, 4A).  
8 Transferring primed CD8<sup>+</sup> T-cells at 1:32 ratio (CD8<sup>+</sup>:CLL) significantly delayed the  
9 development of disease, and suppressing IL-10 further delayed disease development  
10 (Figure 2E-F). When mice were treated with anti-IL-10, leukemic burden is reduced in  
11 the blood (Figure 2E), spleen and bone marrow (Supplementary Figure 3B-C). Similarly,  
12 12mg/kg MTM<sub>ox</sub>32E slowed disease progression in the blood, with less variability (Figure  
13 2F). Both treatments reduced plasma IL-10 levels (Figures 2G-H), demonstrating that  
14 MTM<sub>ox</sub>32E can suppress CLL-derived IL-10 in mice, leading to decreased CLL burden.

15           Spleens from NSG mice also showed decreased CLL burden when IL-10 was  
16 suppressed with MTM<sub>ox</sub>32E. Groups without T-cells had to be euthanized earlier due to  
17 faster CLL progression (day 17 versus day 22), so comparisons are made within T-cell  
18 and no T-cell groups. MTM<sub>ox</sub>32E treatment reduced CLL cell frequency in the spleen and  
19 bone marrow (Supplementary Figure 4B-D). However, splenic CLL burden (count) was  
20 only reduced in NSG mice given primed CD8<sup>+</sup> T-cells and MTM<sub>ox</sub>32E treatment (Figure  
21 3A-B). The number of IL-10 producing splenic CLL cells (Figure 3C) and proliferative  
22 CLL cells in the spleen (Figure 3D) were also only reduced by IL-10 suppression when  
23 T-cells were present, indicating a requirement for T-cells. The lack of significance  
24 without T-cells may be because IL-10 does not affect CLL directly but inhibits the anti-  
25 CLL T-cell response. CD8<sup>+</sup> T-cells in blood and spleen were increased with anti-IL-10  
26 blockade (Supplementary Figure 3D-E).

1           When IL-10 was suppressed with MTM<sub>ox</sub>32E, CD8<sup>+</sup> T-cell functionality improved  
2   in E $\mu$ -TCL1 recipient NSG mice. CD8<sup>+</sup> T-cells persisted throughout the experiment, with  
3   similar frequency and count in the blood and spleen but with a trend towards increase in  
4   the MTM<sub>ox</sub>32E group (Figure 4A, Supplementary Figure 4E-F). Like blocking IL-10 *in*  
5   *vitro*, MTM<sub>ox</sub>32E treatment increased CD8<sup>+</sup> T-cell proliferation as shown by increased  
6   number and frequency of splenic BrdU<sup>+</sup>CD5<sup>+</sup> T-cells (Figure 4B). On average, the  
7   number and frequency of IFN- $\gamma$ <sup>+</sup>CD8<sup>+</sup> (Figure 4C) and Granzyme-B<sup>+</sup>CD8<sup>+</sup> (GzB<sup>+</sup>CD8<sup>+</sup>)  
8   splenic T-cells (Figure 4D) increased with MTM<sub>ox</sub>32E treatment. Some mice upregulated  
9   cytokine production more than others. We found the mice with more proliferative T-cells  
10  also had more cytokine competent T-cells. With IL-10 suppression there was a more  
11  uniform increase in the frequency of CD8<sup>+</sup> cells expressing the effector T-cell marker,  
12  killer cell lectin-like receptor G1 (KLRG1), and the memory marker CD27 (Figure 4E).  
13  KLRG1<sup>+</sup> effector T-cells are more cytotoxic and enhance protective immunity, and thus  
14  may be more active in control of CLL(28). Despite these changes, T-cells increased PD-  
15  1 expression with time, a marker of functionality and eventual exhaustion, regardless of  
16  drug treatment (Figure 4F). Therefore, we hypothesized anti-CLL immunity could be  
17  improved by combining IL-10 suppression with ICB.

18

## 19   **Inhibiting CLL-derived IL-10 production improves responses to anti-PD-L1** 20   **checkpoint blockade**

21           Previous reports described ICB reducing CLL burden in E $\mu$ -TCL1 mice,  
22  especially in combination with other therapies(13, 29). Our results were similar, where  
23  anti-PD-L1 ICB alone modestly reduced CLL prevalence in the blood, and bone marrow  
24  but not spleen (Supplementary Figure 5A-D). Although there were more proliferating  
25  CD8<sup>+</sup> T-cells in spleen (Supplementary Fig 5E), ICB did not alter T-cell abundance, and  
26  yielded fewer IFN- $\gamma$ <sup>+</sup> and more PD-1<sup>+</sup>CD8<sup>+</sup> T-cells (Supplementary Figure 5F-G). We



1 designed our study to test whether IL-10 suppression could enhance the efficacy of anti-  
2 PD-L1 ICB in NSG mice given E $\mu$ -TCL1 and primed CD8<sup>+</sup> T-cells.

3 With anti-PD-L1 ICB and MTM<sub>ox32E</sub> mediated IL-10 suppression combined  
4 (Supplementary Figure 6A), antitumor CD8<sup>+</sup> T-cells were more effective at controlling  
5 E $\mu$ -TCL1. Combination therapy slowed CLL growth in the blood compared to anti-PD-L1  
6 alone or isotype plus vehicle treated control mice (Figure 5A). By the end of the  
7 experiment, CLL frequency (Figure 5B) and burden (Figure 5C) in the spleen were on  
8 average 4.5-fold lower in combination therapy mice versus anti-PD-L1 alone (68.9% vs  
9 15.4%; 94.9x10<sup>6</sup> vs 21.1x10<sup>6</sup> cells). In the spleen, the frequency and number of CD8<sup>+</sup> T-  
10 cells more than doubled (combination vs ICB: 6.97% vs 15.4%, 9.81x10<sup>6</sup> vs 22.14x10<sup>6</sup>  
11 cells, Figure 5D). CD8<sup>+</sup> T-cell levels in the blood were also elevated with combination  
12 therapy (Figure 5E, Supplementary Figure 6B). Spleen size was not different between  
13 the therapy groups, partially due to the expansion of T-cells with combination therapy  
14 (Supplementary Figure 6C-D). Furthermore, combination therapy reduced CLL spread to  
15 the bone marrow (1.58% vs 0.28%, 1.6x10<sup>5</sup> vs 0.2x10<sup>5</sup>, Figure 5F). Combining ICB and  
16 IL-10 suppression dramatically altered the establishment of disease, as only one mouse  
17 receiving combination therapy developed more than 30% CLL in the blood by the end of  
18 the experiment (Figure 5G).

19 Adding IL-10 suppression to ICB altered the proliferative capacity of both CD8<sup>+</sup>  
20 T-cells and CLL cells in NSG mice. As expected, PD-L1<sup>+</sup> CLL cells were decreased with  
21 ICB treatment (Figure 6A). Plasma IL-10 levels were lowest in mice receiving  
22 combination therapy, with intermediate IL-10 levels for anti-PD-L1 alone (Figure 6B).  
23 The number of BrdU<sup>+</sup>CD8<sup>+</sup> T-cells were elevated in both groups (Figure 6C), but the  
24 number of dividing CLL cells only decreased with combination therapy (Figure 6D). This  
25 resulted in a greatly elevated ratio of total and proliferative CD8<sup>+</sup> to CLL cells with  
26 combination therapy (Figure 6E). Interestingly, plasma IL-10 levels inversely correlated

1 with the number of total and dividing CD8<sup>+</sup> T-cells, suggesting IL-10 plays a role in  
2 decreasing T-cell persistence and proliferation (Figure 6F).

3         When combining IL-10 suppression and ICB therapy, the outcome of T-cell  
4 activation was altered. MTM<sub>ox32E</sub> treatment increased the proportion of highly cytotoxic  
5 effector T-cells (KLRG1<sup>+</sup>) and memory T-cells (CD27<sup>+</sup>) over ICB alone (Figure 7A).  
6 There were also higher numbers of splenic IFN- $\gamma$ <sup>+</sup>CD8<sup>+</sup> and GzB<sup>+</sup>CD8<sup>+</sup> T-cells (Figure  
7 7B-C), and CD8<sup>+</sup> T-cells expressing CD107a, a marker of degranulation, in treated mice  
8 (Figure 7D). Still, similar levels of PD-1<sup>+</sup>CD8<sup>+</sup> T-cells were detected in the blood  
9 throughout the experiment (Supplementary Figure 7A). PD-1 is upregulated after T-cell  
10 activation, and truly exhausted T-cells often express other exhaustion markers in  
11 addition to PD-1 (Figure 7E). Though there was a higher frequency of splenic PD-  
12 1<sup>+</sup>CD8<sup>+</sup> T-cells in combination therapy mice (Figure 7F), very few CD8<sup>+</sup> T-cells  
13 expressed other markers of exhaustion, such as CTLA4, Lag3 or Tim-3 (Supplementary  
14 Figure 7B). The total frequency of exhausted cells (PD-1<sup>+</sup>CTLA4<sup>+</sup>, PD-1<sup>+</sup>Lag3<sup>+</sup>, or PD-  
15 1<sup>+</sup>Tim-3<sup>+</sup>) decreased for both treatment groups (Figure 7G, Supplementary Figure 7C),  
16 suggesting that most of the PD-1<sup>+</sup> T-cells were not yet exhausted.

17         The increase in T-cell functionality with IL-10 suppression and ICB combination  
18 therapy shows clearly enhanced antitumor immunity compared to ICB alone, so lastly,  
19 we compared CLL burden within the previous experiment. With this comparison, the  
20 additive effect of IL-10 suppression and ICB became clear. CLL frequency is markedly  
21 lower in the spleen (Figure 7H) and blood (Figure 7I) with the combination therapy  
22 compared to either control or monotherapy. Taken together, these data show improved  
23 CD8<sup>+</sup> T-cell antitumor immunity in CLL with combined ICB and IL-10 suppression.

1 **Discussion:**

2 IL-10 downregulates CD8<sup>+</sup> antitumor immunity(4), and the therapeutic  
3 suppression of IL-10 enhanced CD8<sup>+</sup> T-cell control of CLL in these studies. However,  
4 CD8 T-cell PD-1 expression still increased with disease burden, therefore we combined  
5 IL-10 suppression with anti-PD-L1 ICB. This combination reduced disease burden  
6 compared to ICB alone and increased the number of CD8<sup>+</sup> T-cells, suggesting improved  
7 persistence. The numbers of CD8<sup>+</sup> T-cells expressing functional markers like IFN- $\gamma$ ,  
8 GzB, CD27, and KLRG1 increased and exhausted CD8<sup>+</sup> T-cells decreased,  
9 demonstrating a changed outcome of T-cell activation. These data show IL-10  
10 suppression can improve T-cell functionality, antitumor immunity, and responses to ICB  
11 in CLL. They point to IL-10 suppression as a novel therapeutic strategy that may  
12 improve responses to T-cell-based immunotherapy in human CLL.

13 We describe MTM<sub>ox</sub>32E, a novel small molecule inhibitor of CLL cell IL-10  
14 production, which does not inhibit effector T-cell function, and enhances anti-CLL CD8<sup>+</sup>  
15 T-cell activity. MTM<sub>ox</sub>32E treatment reduced Sp1 occupancy of the IL-10 promoter and  
16 CLL IL-10 secretion but is uniquely less toxic than MTM. Like MTM, MTM<sub>ox</sub>32E interacts  
17 with GC rich regions of DNA. The keto group in the 3-C position in MTM is modified to  
18 an oxime group with methyl indolyl substitution, which may change its interactions with  
19 Sp1 or other GC box-binding proteins, (Yang et al manuscript in preparation) altering its  
20 tolerability. MTM<sub>ox</sub>32E treatment showed some selectivity for inhibiting Sp1 binding on  
21 the IL-10 promoter in cell culture. This may be due to interactions between the analogue  
22 and additional proteins in the transcription complex promoting CLL IL-10 production,  
23 which requires further investigation. MTM<sub>ox</sub>32E also has a small inhibitory effect on CLL  
24 growth in vivo but not in vitro when used as single agent. This could be due to its effect  
25 on the microenvironment, which also requires further investigation. Sp1 positively  
26 regulates murine T-BET (T-box expressed in T-cells), which controls natural killer and T-

1 cell IFN- $\gamma$  expression, and MTM treatment reduced both T-BET and IFN- $\gamma$  production in  
2 natural killer cells(30). However, Sp1 expression and transcriptional activity was shown  
3 to be upregulated in activated and proliferating CD4<sup>+</sup> T cells(31, 32), but not in activated  
4 CD8<sup>+</sup> T-cell subsets(33, 34). Our studies focused on CD8<sup>+</sup> T-cells, where we see no  
5 detrimental effect of MTM<sub>ox32E</sub> treatment. Additional studies are required to elucidate  
6 the differential effects of MTM and MTM<sub>ox32E</sub> on T-cells.

7 In CLL and several solid tumors, IL-10 reduced the inflammatory state of immune  
8 responses including CD8<sup>+</sup> T cells(23, 35-37), although there are examples where IL-10  
9 supported antitumor T-cell function(38-40). Indeed, the role of IL-10 in cancer may be  
10 context dependent. In liver and prostate cancers IL-10 was shown to inhibit cytotoxic T-  
11 cell function and anti-cancer immunity(41, 42). The dose and duration of IL-10 exposure  
12 is critical to its regulatory effects on CD8<sup>+</sup> T-cell maturation into functional memory  
13 cells(43). The IL-10 pathway also plays a role in T-cell exhaustion during chronic viral  
14 infection, and can directly downregulate CD8<sup>+</sup> T-cell function(44, 45). Blocking IL-10 and  
15 PD-1 during chronic viral infection synergistically enhanced viral control and reversed  
16 CD8<sup>+</sup> T-cell exhaustion(46). Furthermore, we previously showed IL-10 inhibits  
17 macrophage pro-inflammatory cytokine secretion in the aged, which may be important  
18 as CLL mainly affects older individuals(47). CD138<sup>+</sup>PD-L1<sup>+</sup> plasma cell derived IL-10  
19 also affects immune responses to infectious agents in part by inhibiting innate immune  
20 cells(48). These innate cells and stromal cells are part of the microenvironment which  
21 supports CLL cell growth. Thus, regulation of innate cells by IL-10 may also contribute  
22 to the benefits from IL-10 suppression.

23 Expression of IL-10 by CLL cells is upregulated by B-cell receptor (BCR)  
24 signaling and may be reduced by inhibitors of this pathway. Many therapeutics for CLL  
25 inhibit kinases in BCR signaling(49, 50), and have yielded great clinical outcomes for  
26 CLL patients. The ability of Bruton's tyrosine kinase (Btk) inhibitors (i.e. ibrutinib) and

1 phosphoinoside-3 kinase (PI3K) inhibitors (i.e. idelalisib) to inhibit CLL growth are well  
2 studied, and may also enhance immune responses(51). However, some patients can  
3 develop resistance mutations or have worse disease after treatment cessation(52, 53).  
4 Ibrutinib treatment also affects T-cells, enhancing their function in CLL patients, which  
5 may be explained by reduced CLL-derived IL-10 in addition to its direct effects(54). CD8<sup>+</sup>  
6 T-cells in hCLL exist in a pseudo-exhausted state(8), and T-cell exhaustion may occur  
7 within certain T-cell populations in patients(55). Reversing this exhaustion may be  
8 possible with the right therapeutic strategy(56). In mouse studies blocking the PD-1/PD-  
9 L1 pathway was promising, but was more effective with additional blockade of Lag-3 or  
10 Tim-3(29, 57). Anti-PD-1 ICB primarily affects CD8<sup>+</sup> T-cells and can rescue exhausted  
11 T-cells, in contrast with anti-CTLA4(58). Nivolumab (anti-PD-1) is currently in clinical  
12 trials for human CLL in combination with the Btk inhibitor ibrutinib (NCT02420912) since  
13 previous reports suggested this combination would be more effective than  
14 monotherapy(12-14). Our findings suggest combining PD-1/PD-L1 blockade with IL-10  
15 suppression could also improve antitumor T-cell responses (Figure 8) and may still be  
16 effective for patients who have developed resistance to Btk inhibitors.

17         With no known cure and the number of cases increasing(59), there is a need for  
18 novel therapies for CLL. Heterogeneous responses to therapy make testing new  
19 strategies challenging(50). However, decreasing IL-10 to improve antitumor immunity  
20 provides an opportunity to overcome CLL-induced immunosuppression and enhance  
21 current CLL immunotherapies. Immune evasion through T-cell suppression is common  
22 to many types of cancer, so this strategy may also be applicable to other tumors(16, 19,  
23 20, 22, 36). Further studies will reveal whether suppressing IL-10 will be an effective in  
24 treating human cancer patients.

1 **Acknowledgements:**

2 We would like to thank the patients and their families for participating in our research  
3 and Dr. Eric Durbin with the Kentucky Cancer Registry. We also thank Dr. Siva  
4 Gandhapudi and Dylan Rivas for their helpful discussion. Jacqueline R. Rivas is a Fellow  
5 of the Leukemia & Lymphoma Society.

6

7 The project described was supported in part by the National Center for Research  
8 Resources and the National Center for Advancing Translational Sciences, National  
9 Institutes of Health, through grants UL1TR001998 and UL1TR000117. It was also  
10 supported by the National Cancer Institute Cancer Center Support Grant P30CA177558,  
11 Training Grant T32CA165990 and Research Grants R01CA165469, R01CA217255, and  
12 R01CA217934. This research was supported by the Flow Cytometry and Immune  
13 Monitoring Shared Resource Facility of the University of Kentucky Markey Cancer  
14 Center (P30CA177558). The content is solely the responsibility of the authors and does  
15 not necessarily represent the official views of the NIH.

16

17 **Competing Interests:**

18 J.S.T. is a co-founder of Centrose (Madison, WI, USA). No other authors have  
19 competing financial interests.

20

21

1 **References:**

- 2 1. Brusa D, Serra S, Coscia M, Rossi D, D'Arena G, Laurenti L, et al. The PD-1/PD-L1 axis  
3 contributes to T-cell dysfunction in chronic lymphocytic leukemia. *Haematologica*.  
4 2013;98(6):953-63.
- 5 2. McClanahan F, Riches JC, Miller S, Day WP, Kotsiou E, Neuberg D, et al. Mechanisms of  
6 PD-L1/PD-1-mediated CD8 T-cell dysfunction in the context of aging-related immune defects in  
7 the Emicro-TCL1 CLL mouse model. *Blood*. 2015;126(2):212-21.
- 8 3. DiLillo DJ, Weinberg JB, Yoshizaki A, Horikawa M, Bryant JM, Iwata Y, et al. Chronic  
9 lymphocytic leukemia and regulatory B cells share IL-10 competence and immunosuppressive  
10 function. *Leukemia*. 2013;27(1):170-82.
- 11 4. Alhakeem SS, McKenna MK, Oben KZ, Noothi SK, Rivas JR, Hildebrandt GC, et al. Chronic  
12 Lymphocytic Leukemia-Derived IL-10 Suppresses Antitumor Immunity. *J Immunol*.  
13 2018;200(12):4180-9.
- 14 5. Alhakeem SS, Sindhava VJ, McKenna MK, Gachuki BW, Byrd JC, Muthusamy N, et al. Role  
15 of B cell receptor signaling in IL-10 production by normal and malignant B-1 cells. *Ann N Y Acad*  
16 *Sci*. 2015;1362:239-49.
- 17 6. Ramsay AG, Johnson AJ, Lee AM, Gorgun G, Le Dieu R, Blum W, et al. Chronic  
18 lymphocytic leukemia T cells show impaired immunological synapse formation that can be  
19 reversed with an immunomodulating drug. *J Clin Invest*. 2008;118(7):2427-37.
- 20 7. Palma M, Gentilcore G, Heimersson K, Mozaffari F, Nasman-Glaser B, Young E, et al. T  
21 cells in chronic lymphocytic leukemia display dysregulated expression of immune checkpoints  
22 and activation markers. *Haematologica*. 2017;102(3):562-72.

- 1 8. Riches JC, Davies JK, McClanahan F, Fatah R, Iqbal S, Agrawal S, et al. T cells from CLL  
2 patients exhibit features of T-cell exhaustion but retain capacity for cytokine production. *Blood*.  
3 2013;121(9):1612-21.
- 4 9. Forconi F, Moss P. Perturbation of the normal immune system in patients with CLL.  
5 *Blood*. 2015;126(5):573-81.
- 6 10. Ding W, LaPlant BR, Call TG, Parikh SA, Leis JF, He R, et al. Pembrolizumab in patients  
7 with CLL and Richter transformation or with relapsed CLL. *Blood*. 2017;129(26):3419-27.
- 8 11. Fraietta JA, Lacey SF, Orlando EJ, Pruteanu-Malinici I, Gohil M, Lundh S, et al.  
9 Determinants of response and resistance to CD19 chimeric antigen receptor (CAR) T cell therapy  
10 of chronic lymphocytic leukemia. *Nat Med*. 2018;24(5):563-71.
- 11 12. Freeman CL, Gribben JG. Immunotherapy in Chronic Lymphocytic Leukaemia (CLL). *Curr*  
12 *Hematol Malig Rep*. 2016;11(1):29-36.
- 13 13. Sagiv-Barfi I, Kohrt HE, Czerwinski DK, Ng PP, Chang BY, Levy R. Therapeutic antitumor  
14 immunity by checkpoint blockade is enhanced by ibrutinib, an inhibitor of both BTK and ITK.  
15 *Proc Natl Acad Sci U S A*. 2015;112(9):E966-72.
- 16 14. Fraietta JA, Beckwith KA, Patel PR, Ruella M, Zheng Z, Barrett DM, et al. Ibrutinib  
17 enhances chimeric antigen receptor T-cell engraftment and efficacy in leukemia. *Blood*.  
18 2016;127(9):1117-27.
- 19 15. Fayad L, Keating MJ, Reuben JM, O'Brien S, Lee BN, Lerner S, et al. Interleukin-6 and  
20 interleukin-10 levels in chronic lymphocytic leukemia: correlation with phenotypic  
21 characteristics and outcome. *Blood*. 2001;97(1):256-63.
- 22 16. Zhao S, Wu D, Wu P, Wang Z, Huang J. Serum IL-10 Predicts Worse Outcome in Cancer  
23 Patients: A Meta-Analysis. *PLoS One*. 2015;10(10):e0139598.



- 1 17. Dai ZM, He AL, Zhang WG, Liu J, Cao XM, Chen YX, et al. Association of the four common  
2 polymorphisms in interleukin-10 (rs1800890, rs1800896, rs1800871, and rs1800872) with non-  
3 Hodgkin's lymphoma risk: a meta-analysis. *Int J Clin Exp Med*. 2014;7(12):4720-33.
- 4 18. Drennan S, D'Avola A, Gao Y, Weigel C, Chrysostomou E, Steele AJ, et al. IL-10  
5 production by CLL cells is enhanced in the anergic IGHV mutated subset and associates with  
6 reduced DNA methylation of the IL10 locus. *Leukemia*. 2017.
- 7 19. Lamichhane P, Karyampudi L, Shreeder B, Krempsi J, Bahr D, Daum J, et al. IL10 Release  
8 upon PD-1 Blockade Sustains Immunosuppression in Ovarian Cancer. *Cancer Res*.  
9 2017;77(23):6667-78.
- 10 20. Gordy JT, Luo K, Francica B, Drake C, Markham RB. Anti-IL-10-mediated Enhancement of  
11 Antitumor Efficacy of a Dendritic Cell-targeting MIP3alpha-gp100 Vaccine in the B16F10 Mouse  
12 Melanoma Model Is Dependent on Type I Interferons. *J Immunother*. 2018;41(4):181-9.
- 13 21. Wu X, Hsu DK, Wang KH, Huang Y, Mendoza L, Zhou Y, et al. IL-10 is overexpressed in  
14 human cutaneous T-cell lymphoma and is required for maximal tumor growth in a mouse  
15 model. *Leuk Lymphoma*. 2019;60(5):1244-52.
- 16 22. Sato T, Terai M, Tamura Y, Alexeev V, Mastrangelo MJ, Selvan SR. Interleukin 10 in the  
17 tumor microenvironment: a target for anticancer immunotherapy. *Immunol Res*. 2011;51(2-  
18 3):170-82.
- 19 23. Oft M. IL-10: master switch from tumor-promoting inflammation to antitumor  
20 immunity. *Cancer Immunol Res*. 2014;2(3):194-9.
- 21 24. Bichi R, Shinton SA, Martin ES, Koval A, Calin GA, Cesari R, et al. Human chronic  
22 lymphocytic leukemia modeled in mouse by targeted TCL1 expression. *Proc Natl Acad Sci U S A*.  
23 2002;99(10):6955-60.

- 1 25. Hou C, Weidenbach S, Cano KE, Wang Z, Mitra P, Ivanov DN, et al. Structures of  
2 mithramycin analogues bound to DNA and implications for targeting transcription factor Fli1.  
3 *Nucleic Acids Res.* 2016;44(18):8990-9004.
- 4 26. Mitra P, Eckenrode JM, Mandal A, Jha AK, Salem SM, Leggas M, et al. Development of  
5 Mithramycin Analogues with Increased Selectivity toward ETS Transcription Factor Expressing  
6 Cancers. *J Med Chem.* 2018;61(17):8001-16.
- 7 27. Choi ES, Nam JS, Jung JY, Cho NP, Cho SD. Modulation of specificity protein 1 by  
8 mithramycin A as a novel therapeutic strategy for cervical cancer. *Sci Rep.* 2014;4:7162.
- 9 28. Herndler-Brandstetter D, Ishigame H, Shinnakasu R, Plajer V, Stecher C, Zhao J, et al.  
10 KLRG1(+) Effector CD8(+) T Cells Lose KLRG1, Differentiate into All Memory T Cell Lineages, and  
11 Convey Enhanced Protective Immunity. *Immunity.* 2018;48(4):716-29 e8.
- 12 29. Wierz M, Pierson S, Guyonnet L, Viry E, Lequeux A, Oudin A, et al. Dual PD1/LAG3  
13 immune checkpoint blockade limits tumor development in a murine model of chronic  
14 lymphocytic leukemia. *Blood.* 2018;131(14):1617-21.
- 15 30. Yu J, Wei M, Boyd Z, Lehmann EB, Trotta R, Mao H, et al. Transcriptional control of  
16 human T-BET expression: the role of Sp1. *Eur J Immunol.* 2007;37(9):2549-61.
- 17 31. Lacroix I, Lipcey C, Imbert J, Kahn-Perles B. Sp1 transcriptional activity is up-regulated by  
18 phosphatase 2A in dividing T lymphocytes. *J Biol Chem.* 2002;277(11):9598-605.
- 19 32. Juang YT, Rauen T, Wang Y, Ichinose K, Benedyk K, Tenbrock K, et al. Transcriptional  
20 activation of the cAMP-responsive modulator promoter in human T cells is regulated by protein  
21 phosphatase 2A-mediated dephosphorylation of SP-1 and reflects disease activity in patients  
22 with systemic lupus erythematosus. *J Biol Chem.* 2011;286(3):1795-801.
- 23 33. Moskowitz DM, Zhang DW, Hu B, Le Saux S, Yanes RE, Ye Z, et al. Epigenomics of human  
24 CD8 T cell differentiation and aging. *Sci Immunol.* 2017;2(8).

- 1 34. He B, Xing S, Chen C, Gao P, Teng L, Shan Q, et al. CD8(+) T Cells Utilize Highly Dynamic  
2 Enhancer Repertoires and Regulatory Circuitry in Response to Infections. *Immunity*.  
3 2016;45(6):1341-54.
- 4 35. Ruffell B, Chang-Strachan D, Chan V, Rosenbusch A, Ho CM, Pryer N, et al. Macrophage  
5 IL-10 blocks CD8+ T cell-dependent responses to chemotherapy by suppressing IL-12 expression  
6 in intratumoral dendritic cells. *Cancer Cell*. 2014;26(5):623-37.
- 7 36. Mahipal A, Terai M, Berd D, Chervoneva I, Patel K, Mastrangelo MJ, et al. Tumor-derived  
8 interleukin-10 as a prognostic factor in stage III patients undergoing adjuvant treatment with an  
9 autologous melanoma cell vaccine. *Cancer Immunol Immunother*. 2011;60(7):1039-45.
- 10 37. Sawant DV, Yano H, Chikina M, Zhang Q, Liao M, Liu C, et al. Adaptive plasticity of IL-  
11 10(+) and IL-35(+) Treg cells cooperatively promotes tumor T cell exhaustion. *Nat Immunol*.  
12 2019;20(6):724-35.
- 13 38. Gu T, De Jesus M, Gallagher HC, Burris TP, Egilmez NK. Oral IL-10 suppresses colon  
14 carcinogenesis via elimination of pathogenic CD4(+) T-cells and induction of antitumor CD8(+) T-  
15 cell activity. *Oncoimmunology*. 2017;6(6):e1319027.
- 16 39. Emmerich J, Mumm JB, Chan IH, LaFace D, Truong H, McClanahan T, et al. IL-10 directly  
17 activates and expands tumor-resident CD8(+) T cells without de novo infiltration from secondary  
18 lymphoid organs. *Cancer Res*. 2012;72(14):3570-81.
- 19 40. Santin AD, Hermonat PL, Ravaggi A, Bellone S, Pecorelli S, Roman JJ, et al. Interleukin-10  
20 increases Th1 cytokine production and cytotoxic potential in human papillomavirus-specific  
21 CD8(+) cytotoxic T lymphocytes. *J Virol*. 2000;74(10):4729-37.
- 22 41. Shalapour S, Lin XJ, Bastian IN, Brain J, Burt AD, Aksenov AA, et al. Inflammation-induced  
23 IgA+ cells dismantle anti-liver cancer immunity. *Nature*. 2017;551(7680):340-5.

- 1 42. Shalpour S, Font-Burgada J, Di Caro G, Zhong Z, Sanchez-Lopez E, Dhar D, et al.  
2 Immunosuppressive plasma cells impede T-cell-dependent immunogenic chemotherapy.  
3 Nature. 2015;521(7550):94-8.
- 4 43. Cui W, Liu Y, Weinstein JS, Craft J, Kaech SM. An interleukin-21-interleukin-10-STAT3  
5 pathway is critical for functional maturation of memory CD8+ T cells. Immunity. 2011;35(5):792-  
6 805.
- 7 44. Brooks DG, Trifilo MJ, Edelmann KH, Teyton L, McGavern DB, Oldstone MB. Interleukin-  
8 10 determines viral clearance or persistence in vivo. Nat Med. 2006;12(11):1301-9.
- 9 45. Smith LK, Boukhaled GM, Condotta SA, Mazouz S, Guthmiller JJ, Vijay R, et al.  
10 Interleukin-10 Directly Inhibits CD8(+) T Cell Function by Enhancing N-Glycan Branching to  
11 Decrease Antigen Sensitivity. Immunity. 2018;48(2):299-312 e5.
- 12 46. Brooks DG, Ha SJ, Elsaesser H, Sharpe AH, Freeman GJ, Oldstone MB. IL-10 and PD-L1  
13 operate through distinct pathways to suppress T-cell activity during persistent viral infection.  
14 Proc Natl Acad Sci U S A. 2008;105(51):20428-33.
- 15 47. Chelvarajan RL, Liu Y, Popa D, Getchell ML, Getchell TV, Stromberg AJ, et al. Molecular  
16 basis of age-associated cytokine dysregulation in LPS-stimulated macrophages. J Leukoc Biol.  
17 2006;79(6):1314-27.
- 18 48. Lino AC, Dang VD, Lampropoulou V, Welle A, Joedicke J, Pohar J, et al. LAG-3 Inhibitory  
19 Receptor Expression Identifies Immunosuppressive Natural Regulatory Plasma Cells. Immunity.  
20 2018;49(1):120-33 e9.
- 21 49. Roberts AW, Davids MS, Pagel JM, Kahl BS, Puvvada SD, Gerecitano JF, et al. Targeting  
22 BCL2 with Venetoclax in Relapsed Chronic Lymphocytic Leukemia. N Engl J Med.  
23 2016;374(4):311-22.

- 1 50. Jain N, O'Brien S. Targeted therapies for CLL: Practical issues with the changing  
2 treatment paradigm. *Blood Rev.* 2016;30(3):233-44.
- 3 51. Woyach JA, Johnson AJ, Byrd JC. The B-cell receptor signaling pathway as a therapeutic  
4 target in CLL. *Blood.* 2012;120(6):1175-84.
- 5 52. Jain P, Thompson PA, Keating M, Estrov Z, Ferrajoli A, Jain N, et al. Long-term outcomes  
6 for patients with chronic lymphocytic leukemia who discontinue ibrutinib. *Cancer.*  
7 2017;123(12):2268-73.
- 8 53. Ahn IE, Underbayev C, Albitar A, Herman SE, Tian X, Maric I, et al. Clonal evolution  
9 leading to ibrutinib resistance in chronic lymphocytic leukemia. *Blood.* 2017;129(11):1469-79.
- 10 54. Long M, Beckwith K, Do P, Mundy BL, Gordon A, Lehman AM, et al. Ibrutinib treatment  
11 improves T cell number and function in CLL patients. *J Clin Invest.* 2017;127(8):3052-64.
- 12 55. Hanna BS, Roessner PM, Yazdanparast H, Colomer D, Campo E, Kugler S, et al. Control of  
13 chronic lymphocytic leukemia development by clonally-expanded CD8(+) T-cells that undergo  
14 functional exhaustion in secondary lymphoid tissues. *Leukemia.* 2019;33(3):625-37.
- 15 56. Bachireddy P, Hainz U, Rooney M, Pozdnyakova O, Aldridge J, Zhang W, et al. Reversal of  
16 in situ T-cell exhaustion during effective human antileukemia responses to donor lymphocyte  
17 infusion. *Blood.* 2014;123(9):1412-21.
- 18 57. Ngiow SF, von Scheidt B, Akiba H, Yagita H, Teng MW, Smyth MJ. Anti-TIM3 antibody  
19 promotes T cell IFN-gamma-mediated antitumor immunity and suppresses established tumors.  
20 *Cancer Res.* 2011;71(10):3540-51.
- 21 58. Wei SC, Anang NAS, Sharma R, Andrews MC, Reuben A, Levine JH, et al. Combination  
22 anti-CTLA-4 plus anti-PD-1 checkpoint blockade utilizes cellular mechanisms partially distinct  
23 from monotherapies. *Proc Natl Acad Sci U S A.* 2019;116(45):22699-709.

1 59. Chen Q, Jain N, Ayer T, Wierda WG, Flowers CR, O'Brien SM, et al. Economic Burden of  
2 Chronic Lymphocytic Leukemia in the Era of Oral Targeted Therapies in the United States. *J Clin*  
3 *Oncol.* 2017;35(2):166-74.

4

5

1 **Figure Legends:**

2 **Figure 1: CLL IL-10 suppresses T-cell responses.** (A) Proliferation of CLL-primed  
3 CD8<sup>+</sup> T-cells in response to anti-CD3 or varying numbers of E $\mu$ -TCL1 splenocytes after  
4 72 hour stimulation, with or without 10 $\mu$ g/mL anti-IL-10. Secreted IL-10 (B) and IFN- $\gamma$  (C)  
5 from cultures in panel A (E $\mu$ -TCL1 spleen cells alone produced 986pg/mL IL-10 and  
6 80pg/mL IFN- $\gamma$ ). (D) Proliferation of CLL-primed CD8<sup>+</sup> T-cells stimulated with anti-CD3  
7 or varying numbers of E $\mu$ -TCL1 splenocytes after 72 hours with or without 1 $\mu$ M  
8 MTM<sub>ox</sub>32E. Secreted IL-10 (E) and IFN- $\gamma$  (F) from cultures in panel D (E $\mu$ -TCL1 spleen  
9 cells alone produced 948pg/mL IL-10 and 78pg/mL IFN- $\gamma$ ). Two-way ANOVA between  
10 control and antibody or inhibitor treatment was used to calculate statistical significance.  
11 \*\*p<0.01, \*\*\*p<0.001, \*\*\*\*p<0.0001

12

13 **Figure 2: MTM<sub>ox</sub>32E suppresses CLL IL-10 and anti-IL-10 enhances anti-CLL**  
14 **activity of T-cells.** (A) Secreted IL-10 from E $\mu$ -TCL1 splenocytes, IL-2 from murine  
15 C57BL/6 CD4<sup>+</sup> T-cells, and IFN- $\gamma$  from murine C57BL/6 CD8<sup>+</sup> T-cells cultured for 24  
16 hours with MTM<sub>ox</sub>32E, normalized to vehicle control (660pg/mL, 398pg/mL, 106pg/mL,  
17 respectively). T-cells were stimulated with 10 $\mu$ g/mL anti-CD3. (B) Proliferation (BrdU  
18 incorporation) of C57BL/6 CD8<sup>+</sup> T-cells cultured for 72 hours with 10 $\mu$ g/mL anti-CD3  $\pm$   
19 MTM<sub>ox</sub>32E. (C) Secreted IL-10 from human CLL PBMCs stimulated with 25 $\mu$ g/mL anti-  
20 IgM for 24 hours with MTM<sub>ox</sub>32E, normalized to vehicle control (17-656pg/mL). (D)  
21 Promoter occupancy of Sp1 GC-rich sites on the human IL-10 promoter in Mec1 cells  
22 treated with 1000nM MTM<sub>ox</sub>32E. (E-F) Frequency of E $\mu$ -TCL1 CLL cells in the blood of  
23 NSG mice (mean + SEM). Six groups of eight NSG mice were injected with E $\mu$ -TCL1  
24 CLL, with or without E $\mu$ -TCL1 primed CD8<sup>+</sup> T-cells (CLL to T cell ratio of 32:1) and  
25 received 150 $\mu$ g anti-IL-10 or isotype every two days (E) or 12mg/kg MTM<sub>ox</sub>32E or

1 vehicle every three days (F). Stars indicate statistical significance of differences between  
2 control and anti-IL-10 (E) or MTM<sub>ox</sub>32E (F) treated group. (G-H) Plasma IL-10 levels in  
3 NSG mice from E-F (mean + SEM). Stars indicate significance between control and anti-  
4 IL-10 (G) or MTM<sub>ox</sub>32E (H) treated group. Statistical comparisons in A and E-H were  
5 performed with two-way ANOVA comparing all groups to each other, and in D one-way  
6 ANOVA for vehicle to MTM<sub>ox</sub>32E at each GC-rich site. \*p<0.05, \*\*p<0.01, \*\*\*p<0.001,  
7 VC=vehicle control

8

9 **Figure 3: Inhibiting CLL IL-10 with MTM<sub>ox</sub>32E requires T-cells for optimal effect.**

10 Four groups of eight NSG mice were injected with E $\mu$ -TCL1 CLL, with or without E $\mu$ -  
11 TCL1 primed CD8<sup>+</sup> T-cells (CLL:T cell ratio 32:1) and received 12mg/kg MTM<sub>ox</sub>32E or  
12 vehicle every three days. (A) Gating strategy for detecting CLL cells, IL-10 production,  
13 and BrdU incorporation. (B) Burden of E $\mu$ -TCL1 CLL cells in the spleen of NSG mice  
14 without CD8<sup>+</sup> T-cells (left panel, euthanized day 17) and with CD8<sup>+</sup> T-cells (right panel,  
15 euthanized day 22). (C) Count of IL-10<sup>+</sup> E $\mu$ -TCL1 CLL cells in the spleen of NSG mice  
16 without CD8<sup>+</sup> T-cells (left, day 17) and with CD8<sup>+</sup> T-cells (right, day 22). (D) Count of  
17 proliferative (BrdU<sup>+</sup>) E $\mu$ -TCL1 CLL cells in the spleen of NSG mice without CD8<sup>+</sup> T-cells  
18 (left, day 17) and with CD8<sup>+</sup> T-cells (right, day 22). Statistical comparisons were  
19 calculated using one-way ANOVA between matched groups. \*p<0.05, \*\*p<0.01,  
20 \*\*\*p<0.001

21

22 **Figure 4: Inhibiting CLL IL-10 with MTM<sub>ox</sub>32E increases the numbers of T- effector**

23 **cells.** Mice were treated as in Figure 3. (A) Frequency of CD8<sup>+</sup> T-cells in the blood of  
24 NSG mice. (B) (Left) Representative histograms of BrdU incorporation by splenic  
25 CD5<sup>+</sup>CD19<sup>-</sup> T-cells (>99% CD8<sup>+</sup>). Frequency (middle) and number (right) of BrdU<sup>+</sup>  
26 splenic CD8<sup>+</sup> T-cells. (C) (Left) Representative histograms of IFN- $\gamma$  production by splenic



1 CD8<sup>+</sup> T-cells. Frequency (middle) and number (right) of splenic IFN- $\gamma$ <sup>+</sup> CD8<sup>+</sup> T-cells. (D)  
2 Frequency (left) and number (right) of GzB<sup>+</sup> CD8<sup>+</sup> T-cells in the spleen. (E) Frequency of  
3 KLRG1<sup>+</sup> highly cytotoxic effector and CD27<sup>+</sup> memory CD8<sup>+</sup> T-cells in the spleen (left)  
4 and pie chart representations of CD8<sup>+</sup> T-cell proportions. (F) Frequency of PD-1  
5 expressing CD8<sup>+</sup> T-cells in the blood. Statistical comparisons in A+F were obtained by  
6 two-way ANOVA comparing vehicle to MTM<sub>ox</sub>32E treated mice, and in B-E by one-way  
7 ANOVA between vehicle to MTM<sub>ox</sub>32E. \*p<0.05

8

9 **Figure 5: Anti-PD-L1 checkpoint blockade is more effective when combined with**  
10 **IL-10 suppression by MTM<sub>ox</sub>32E.** Three groups of thirteen NSG mice were injected  
11 with E $\mu$ -TCL1 and E $\mu$ -TCL1 primed CD8<sup>+</sup> T-cells at a ratio of one T cell to 32 CLL cells.  
12 Mice received 12mg/kg MTM<sub>ox</sub>32E or vehicle every two to three days plus 10mg/kg anti-  
13 PD-L1 or isotype control every three days. (A) Frequency of E $\mu$ -TCL1 CLL cells in the  
14 blood of NSG mice (mean + SEM). (B-C) Frequency (B) and count (C) of E $\mu$ -TCL1 CLL  
15 cells in the spleen. (D) Frequency (left) and count (right) of CD8<sup>+</sup> T-cells in the spleen of  
16 recipient NSG mice. (E) Frequency of CD8<sup>+</sup> T-cells in the blood of NSG recipients (mean  
17 + SEM). (F) Frequency (left) and count (right) of E $\mu$ -TCL1 CLL cells in the bone marrow.  
18 (G) Percent of mice with less than 30% CLL in the blood over time. Statistical  
19 significance in A, E, G was calculated by two-way ANOVA comparing vehicle to treated  
20 mice, and by one-way ANOVA comparing vehicle to treated mice in remaining panels.  
21 \*p<0.05, \*\*p<0.01, \*\*\*p<0.001, \*\*\*\*p<0.0001 indicate statistical significance of  
22 \*difference between combination and ICB alone, #difference between combination and  
23 control, &difference between ICB alone and control

24

25 **Figure 6: Adding IL-10 inhibitor MTM<sub>ox</sub>32E to anti-PD-L1 alters CD8+ cell**  
26 **proliferation.** Mice were treated as in Figure 5. (A) Frequency of PD-L1<sup>+</sup> E $\mu$ -TCL1 CLL

1 cells in the spleen of NSG mice. (B) Plasma IL-10 levels at euthanasia. (C) Count of  
2 BrdU<sup>+</sup> splenic CD8<sup>+</sup> T-cells. (D) Count of BrdU<sup>+</sup> E $\mu$ -TCL1 CLL cells in the spleen. (E)  
3 Ratio of total count and count of proliferating CD8<sup>+</sup> T-cells to E $\mu$ -TCL1 CLL cells. (F)  
4 Correlation between plasma IL-10 levels and total CD8<sup>+</sup> T-cell count (left) or proliferating  
5 CD8<sup>+</sup> T-cell count (right). Graphs show the Pearson's r correlation coefficient, two-tailed  
6 p-value, trendline, and 95% confidence interval. Other statistical comparisons were done  
7 by one-way ANOVA comparing vehicle to treated mice. \*p<0.05, \*\*p<0.01, \*\*\*p<0.001,  
8 \*\*\*\*p<0.0001

9

10 **Figure 7: T-cells from E $\mu$ -TCL1 mice are more functional when treated with both**  
11 **anti-PD-L1 checkpoint blockade and IL-10 blockade.** Mice were treated as in Figure  
12 5. (A) Frequency of KLRG1<sup>+</sup> highly cytotoxic effector and CD27<sup>+</sup> memory CD8<sup>+</sup> T-cells in  
13 the spleen (left) and pie chart representations of CD8<sup>+</sup> T-cell proportions. (B-C) Count of  
14 IFN- $\gamma$ <sup>+</sup> (B) and GzB<sup>+</sup> (C) splenic CD8<sup>+</sup> T-cells. (D) Frequency of CD107a<sup>+</sup> splenic CD8<sup>+</sup>  
15 T-cells. (E) Gating strategy for PD1<sup>+</sup>CD8<sup>+</sup> T-cells, and representative histograms  
16 showing CTLA4, Lag-3, or Tim-3 expression by PD1<sup>+</sup>CD8<sup>+</sup> cells. (F-G) Frequency of PD-  
17 1<sup>+</sup> CD8<sup>+</sup> T-cells (F) and exhausted CD8<sup>+</sup> T-cells (double positive for PD-1<sup>+</sup> and either  
18 CTLA4<sup>+</sup>, Lag-3<sup>+</sup>, or Tim-3<sup>+</sup>) (G) in the spleen. (H) Comparison of CLL frequency in  
19 spleen from Figure 5B and Supplemental Figure 4B. (I) Comparison of CLL frequency in  
20 the blood from Figures 2F and 5A. Statistical comparisons done by one-way ANOVA  
21 comparing vehicle to treated mice, except in H+I where all groups were compared to  
22 each other. \*p<0.05, \*\*p<0.01, \*\*\*p<0.001, \*\*\*\*p<0.0001

23

24 **Figure 8: Cooperation of IL-10 suppression and checkpoint blockade.** Model shows  
25 combining IL-10 suppression with anti-PD-L1 ICB enhances antitumor CD8<sup>+</sup> T-cell  
26 activity by counteracting multiple methods of CLL immune suppression.

# Figure 1

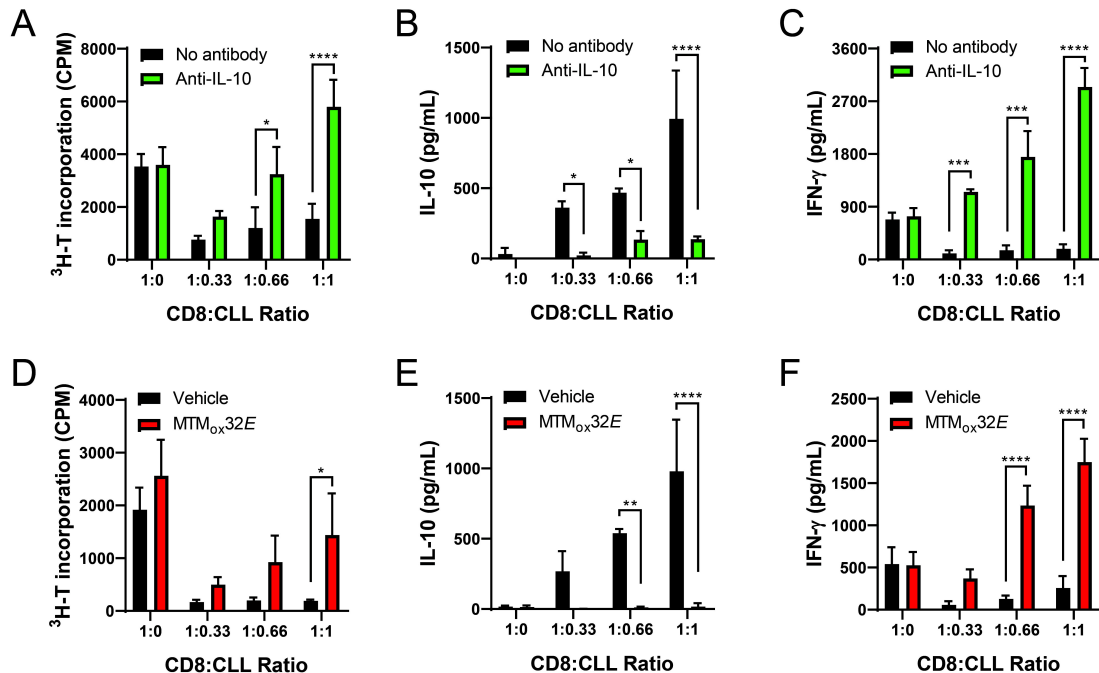

# Figure 2

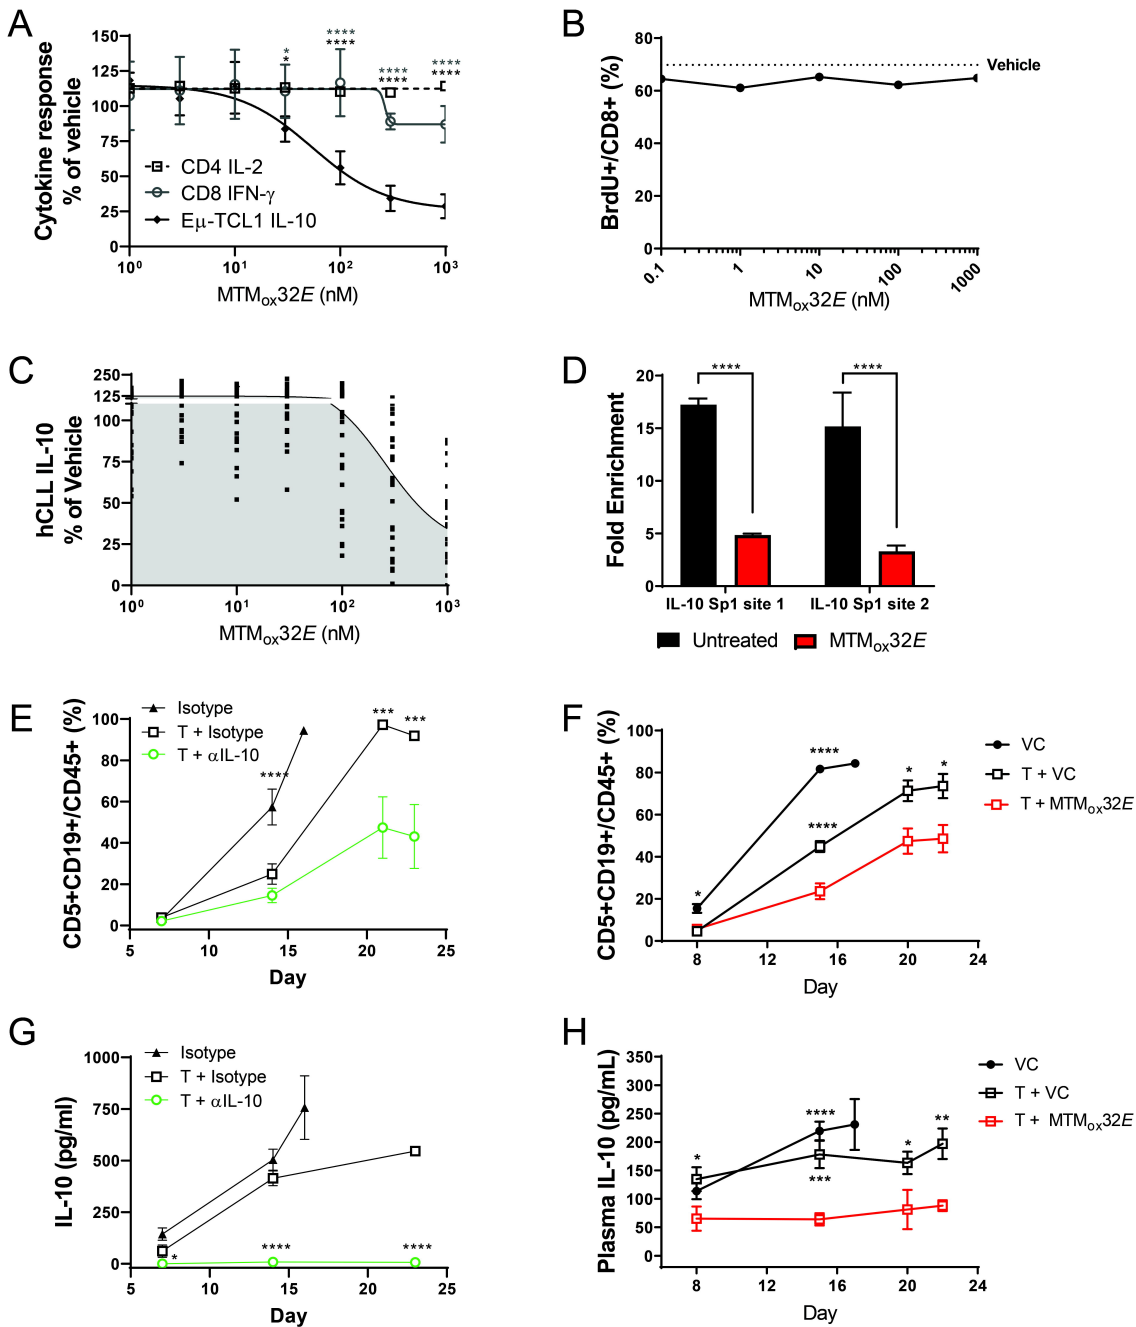

# Figure 3

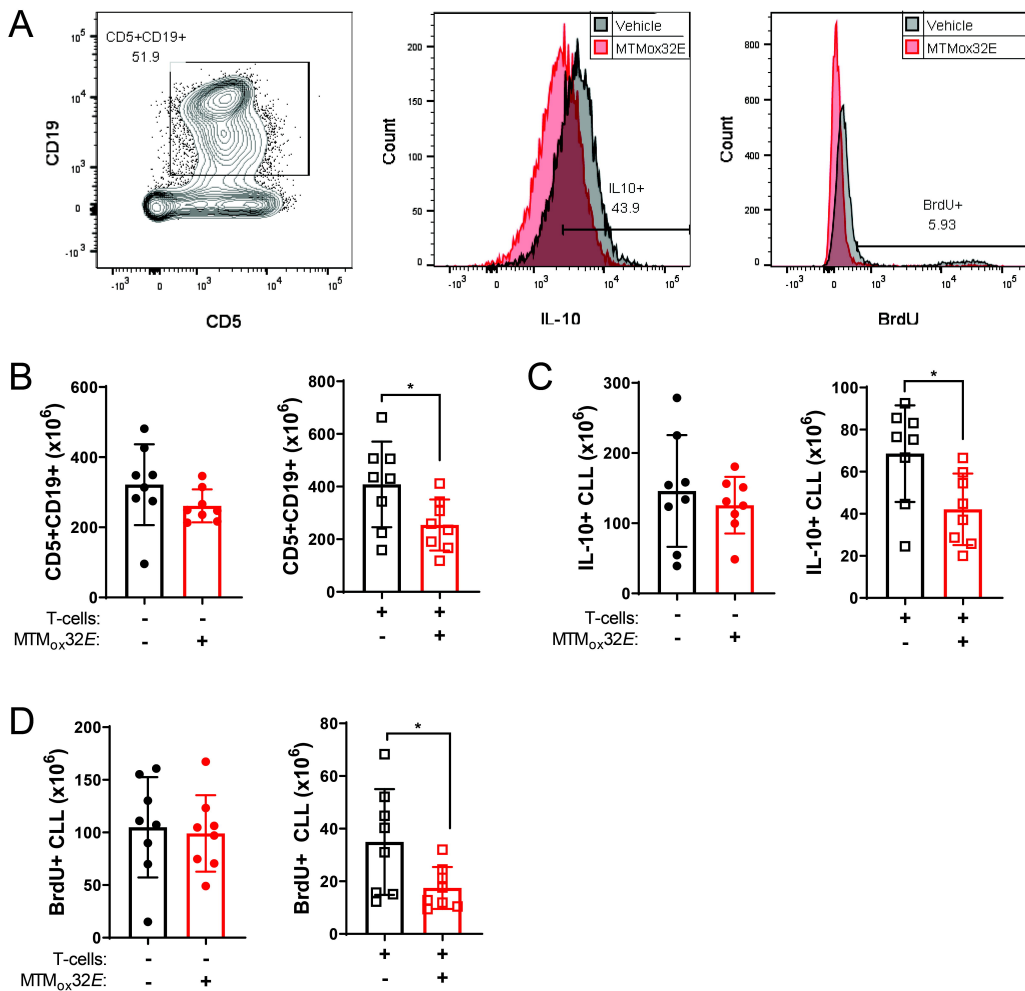

Figure 4

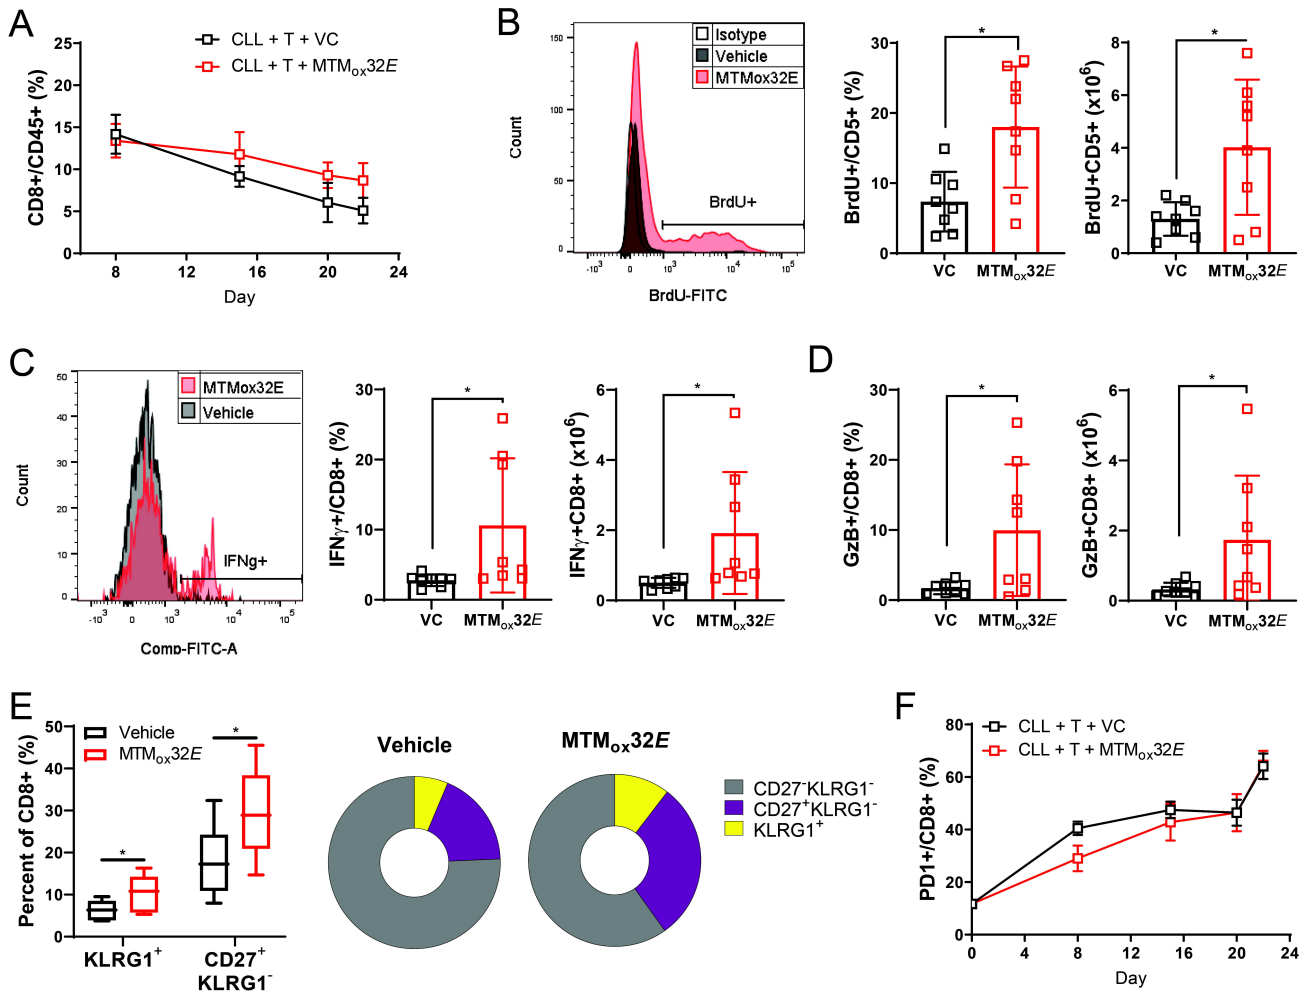

Figure 5

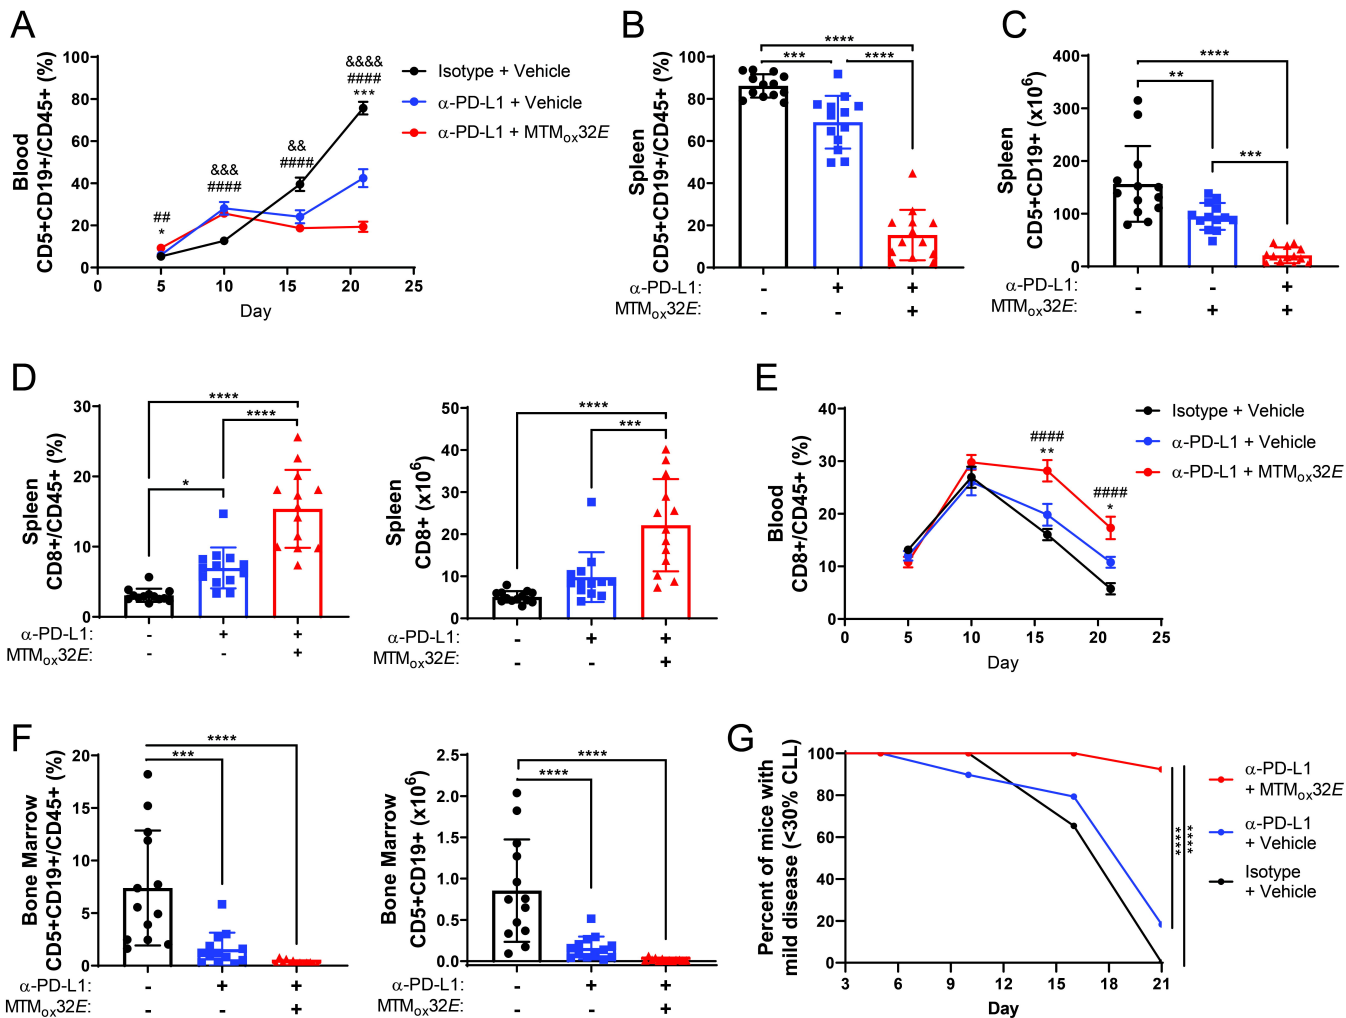

# Figure 6

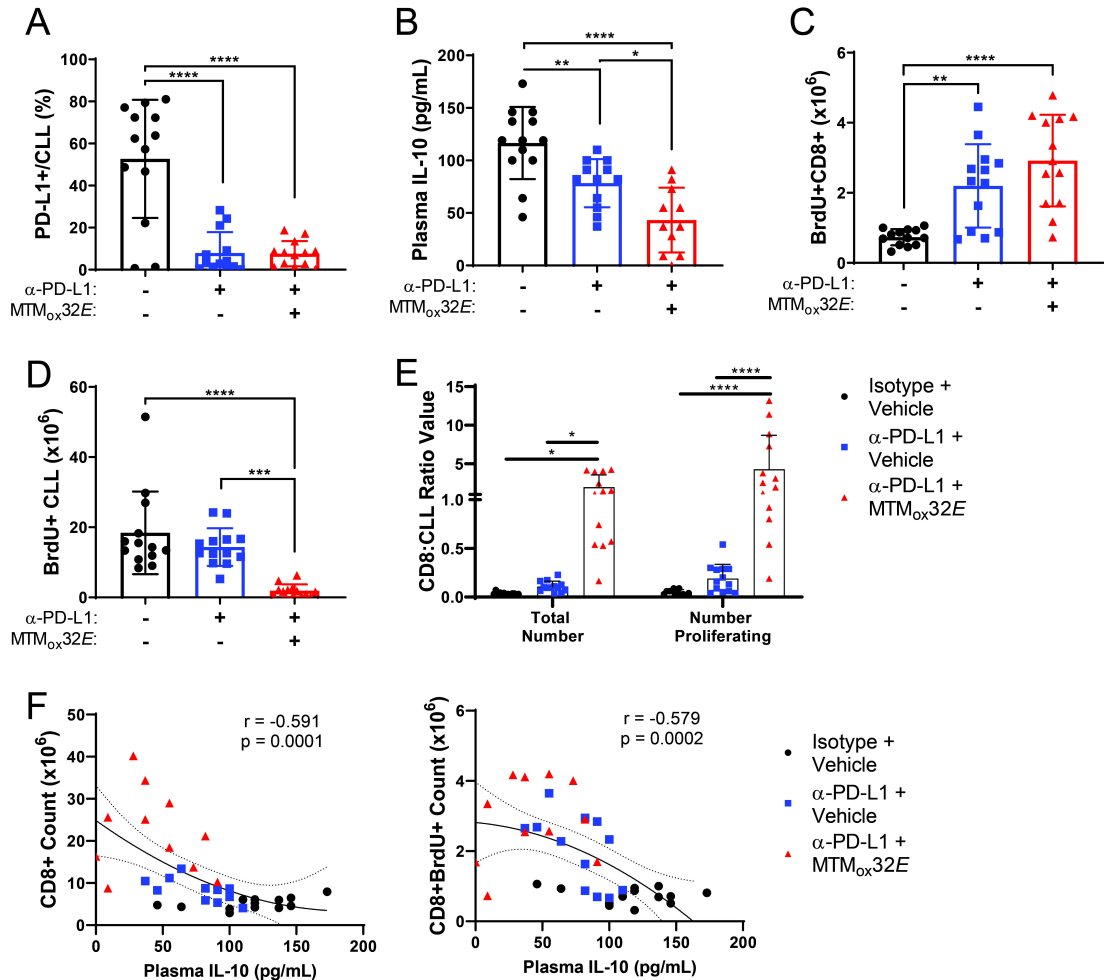



Figure 7

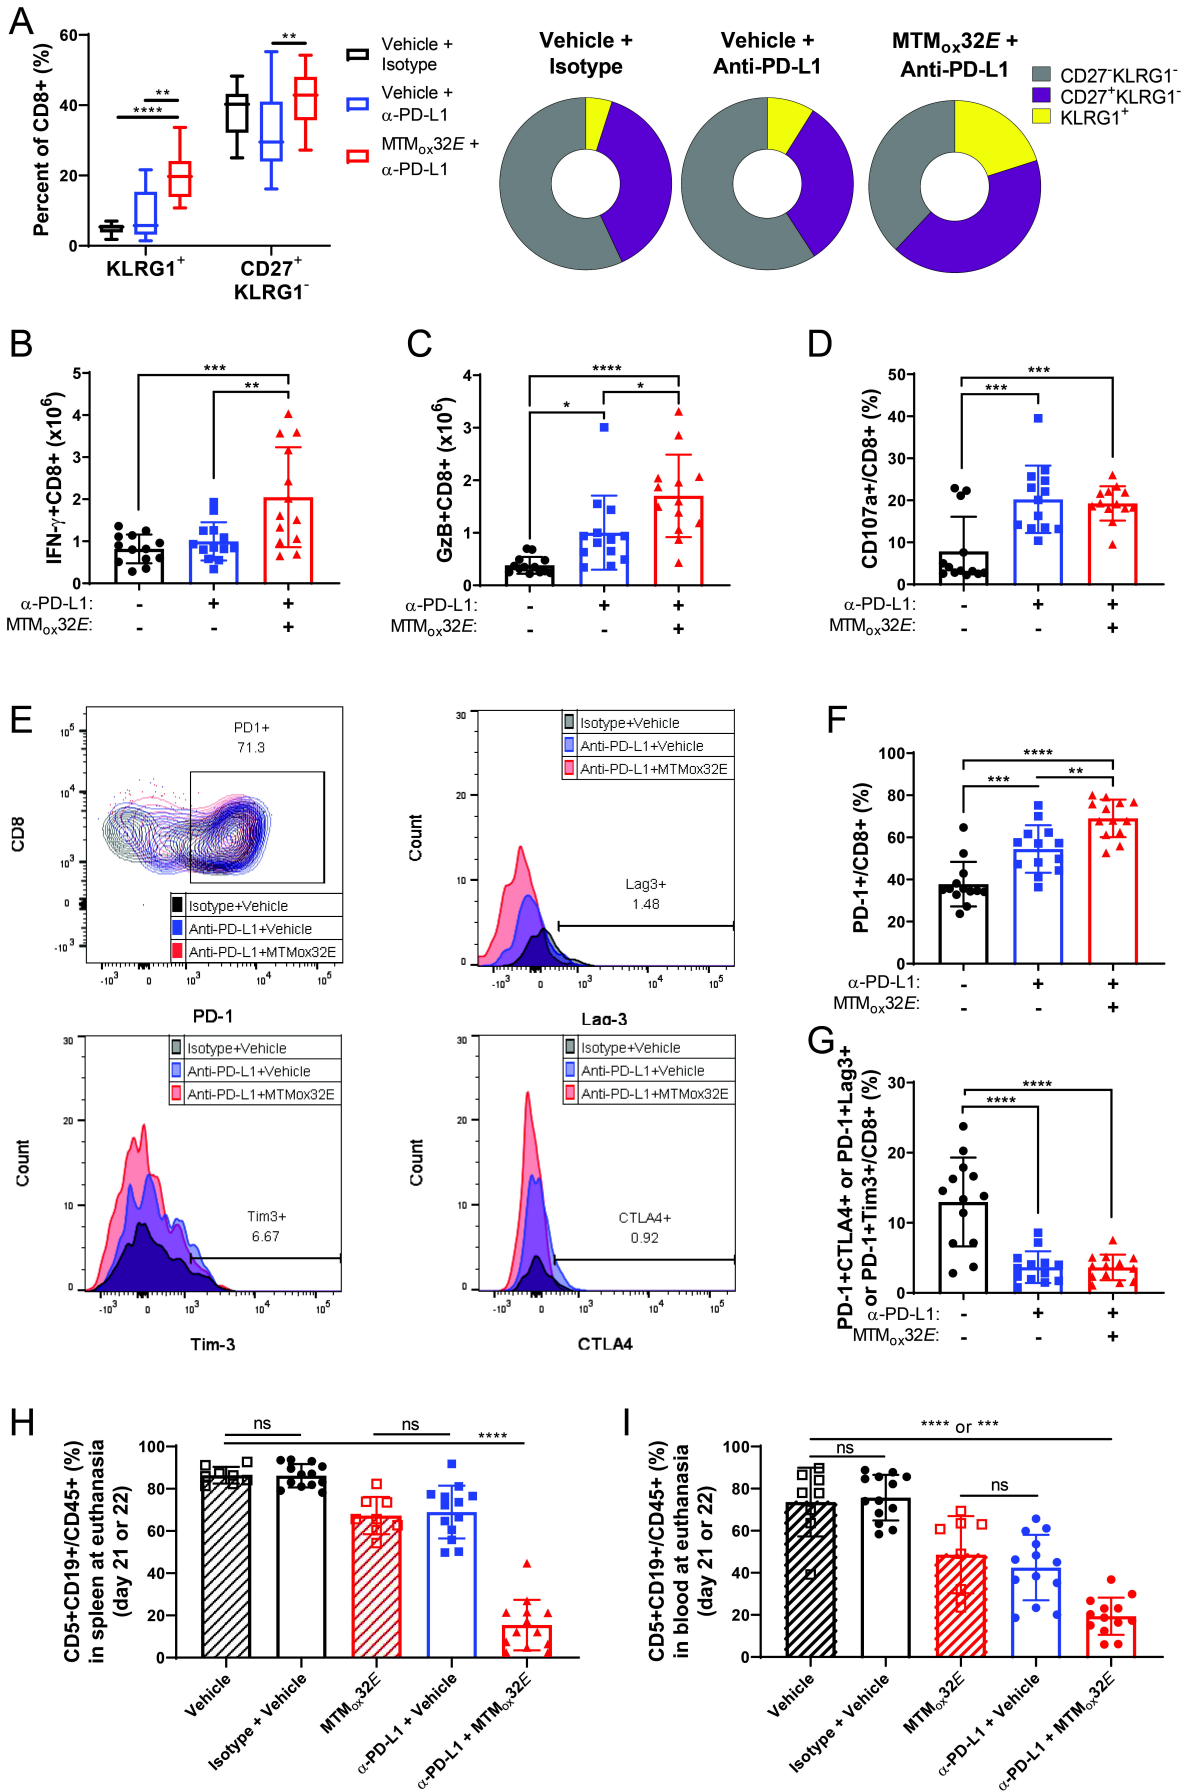

Figure 8

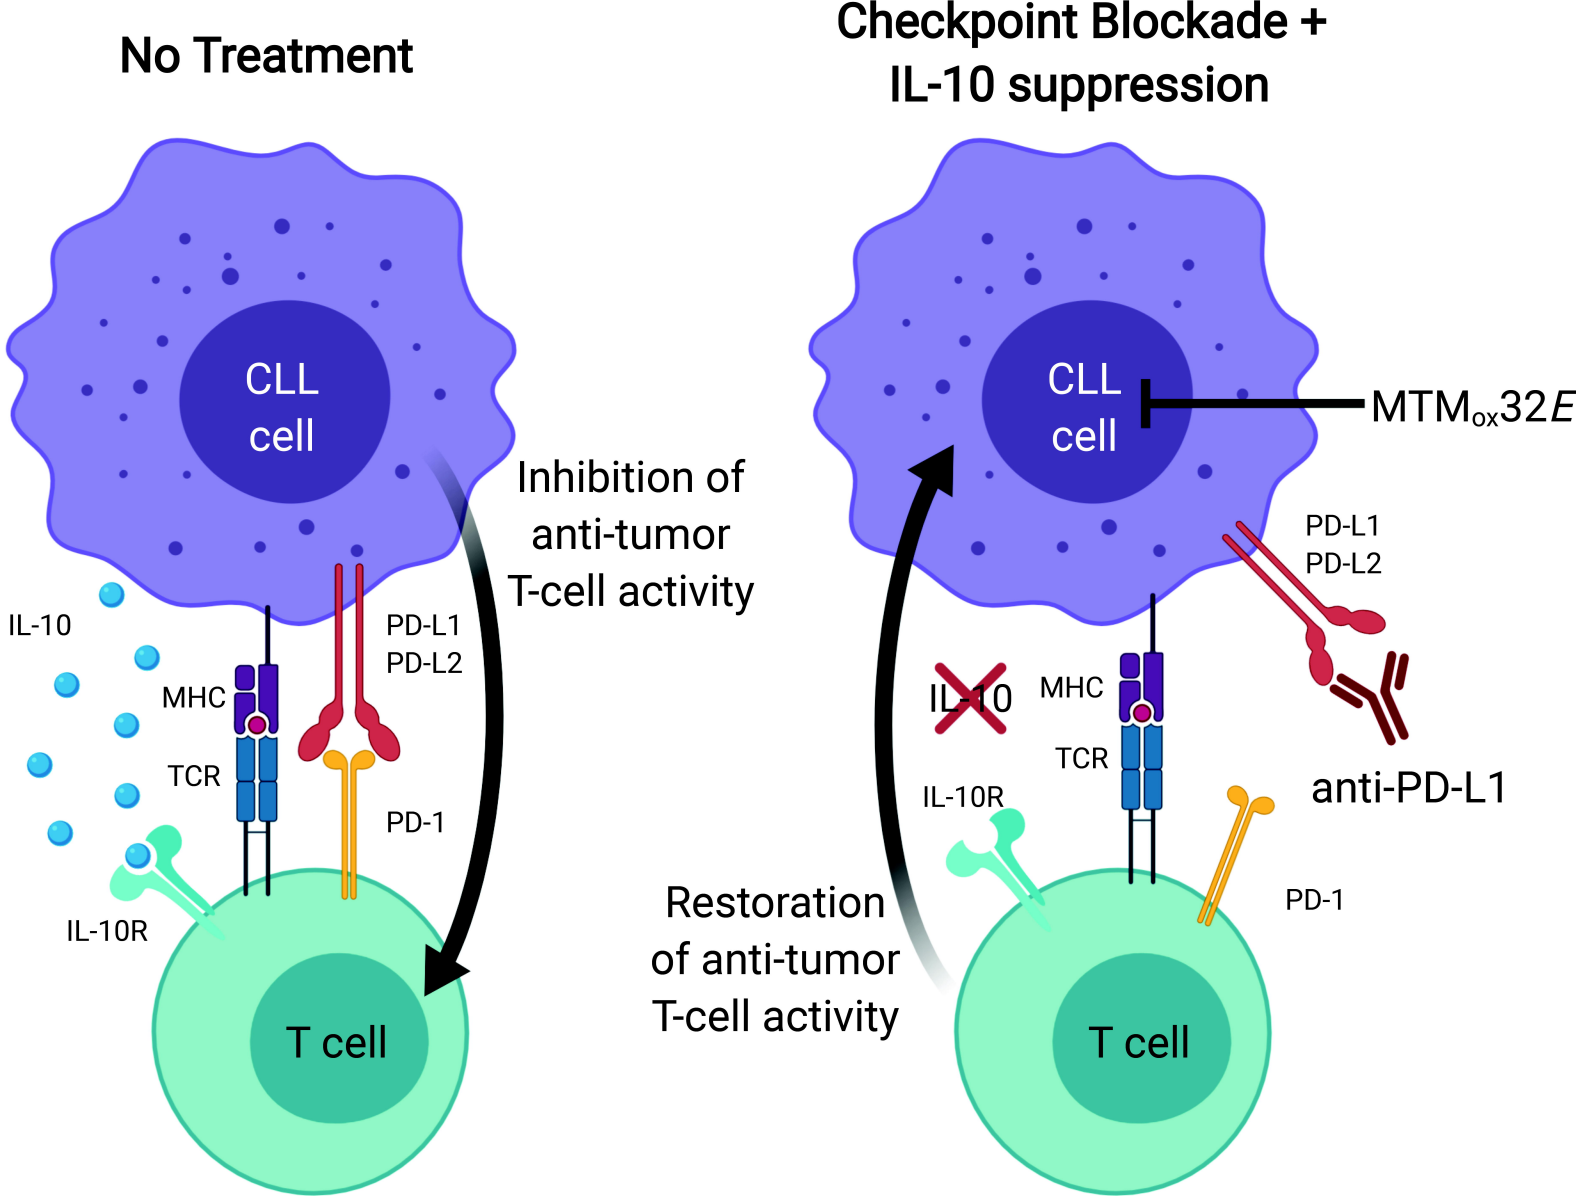

Source: https://www.biorxiv.org/content/10.1101/2020.07.15.204560v1.full.pdf
